# Supplementary material for: Contact diaries versus wearable proximity sensors in measuring contact patterns at a conference: method comparison and participants’ attitudes
Source: Springer Nature journal article supplement (doi:10.1186/s12879-016-1676-y), 2016-07-22
Supplement: MOESM13 [file 10514366]

## Additional file 13

### Supplementary Results, Figures and Tables

Supplement to: Timo Smieszek, Stefanie Castell, Alain Barrat, Ciro Cattuto, Peter J. White, Gérard Krause. Contact diaries versus wearable proximity sensors in measuring contact patterns at a conference: method comparison and participants' attitudes.

### Supplementary Text

#### Gender and age effects in reporting of very short contacts

Of the sensor-recorded <5min contacts of participants younger than 40, 28.2% [21.9%-35.1%] were reported by them against 42.9% [32.4%-55.4%] of those of older participants. Analysis stratified by gender resulted in reporting probabilities of 31.2% [23.5%-40.4%] for <5min contacts in female and 37.8% [28.9%-46.9%] in male participants. Combining age and gender in the analysis, the following reporting probabilities for contacts in the <5min category were observed: young females 29.3% [22.2%-37.6%] vs. young males 25.3% [13.2%-39.1%], and older females 37.5% [16.7%-70.0%] vs. older males 46.4% [36.8%-55.2%].

### Supplementary Figure

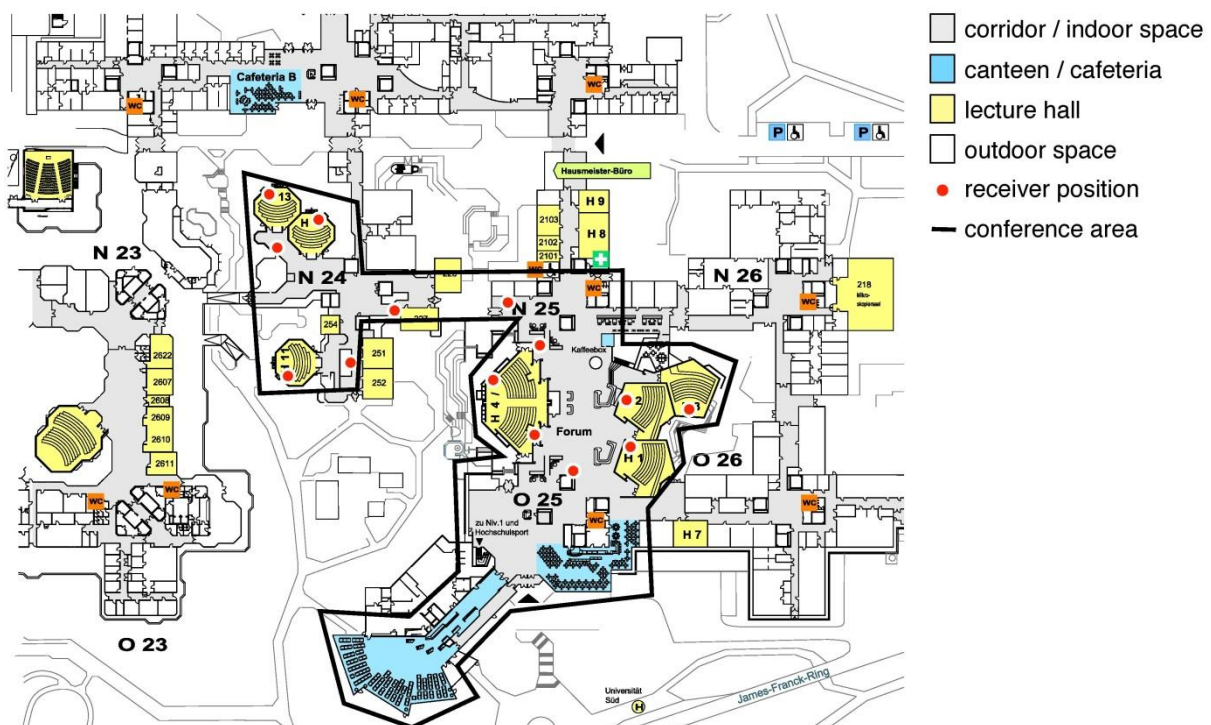

**Figure S1:** Floor plan of university campus where the conference took place. Conference sessions took place in lecture halls H1, H2, H3, H4/5, H11, H12, H13 (lecture halls with receivers). Red dots show receiver positions; the canteen could not be covered with

receivers. This figure is an adapted version of a floor plan that was kindly provided by “Vermögen und Bau Baden-Württemberg, Amt Ulm.”

### Supplementary Tables

**Table S1:** Number of contacts stratified by kind of contact as reported in the diaries.

| Kind of contact: less intense | Kind of contact: more intense |                |                |              |                  |
|-------------------------------|-------------------------------|----------------|----------------|--------------|------------------|
|                               | conversation                  | physical       | both           | missing      | Σ                |
| no report                     | <b>16</b> (20)                | <b>5</b> (5)   | <b>4</b> (7)   | <b>0</b> (0) | <b>25</b> (32)   |
| unknown ID                    | <b>19</b> (23)                | <b>2</b> (2)   | <b>5</b> (8)   | <b>1</b> (1) | <b>27</b> (34)   |
| conversation                  | <b>49</b> (46)                | <b>6</b> (6)   | <b>19</b> (17) | <b>0</b> (0) | <b>74</b> (69)   |
| physical                      | <b>n.d.</b>                   | <b>3</b> (3)   | <b>18</b> (18) | <b>0</b> (0) | <b>21</b> (21)   |
| both                          | <b>n.d.</b>                   | <b>n.d.</b>    | <b>37</b> (35) | <b>0</b> (0) | <b>37</b> (35)   |
| missing                       | <b>1</b> (1)                  | <b>2</b> (2)   | <b>2</b> (2)   | <b>0</b> (0) | <b>5</b> (5)     |
| Σ                             | <b>85</b> (90)                | <b>18</b> (18) | <b>85</b> (87) | <b>1</b> (1) | <b>189</b> (196) |

For concordant reports that differ in their classification, columns contain the more, rows the less intense category; discordant reports and unknown IDs are also shown in rows; bold numbers show data after matching (diary-optimized), numbers in parentheses show crude data; n.d. = not defined.

**Table S2:** Number of contacts stratified by how well the contact partner is known (as reported in the diaries).

|                                         | <b>Reported familiarity: less known</b> |                |              |                  |
|-----------------------------------------|-----------------------------------------|----------------|--------------|------------------|
|                                         | known                                   | unknown        | missing      | $\Sigma$         |
| <b>Reported familiarity: more known</b> |                                         |                |              |                  |
| no report                               | <b>18</b> (23)                          | <b>7</b> (9)   | <b>0</b> (0) | <b>25</b> (32)   |
| unknown ID                              | <b>10</b> (16)                          | <b>17</b> (18) | <b>0</b> (0) | <b>27</b> (34)   |
| known                                   | <b>86</b> (81)                          | <b>11</b> (10) | <b>0</b> (0) | <b>97</b> (91)   |
| unknown                                 | <b>n.d.</b>                             | <b>35</b> (34) | <b>0</b> (0) | <b>35</b> (34)   |
| missing                                 | <b>3</b> (3)                            | <b>2</b> (2)   | <b>0</b> (0) | <b>5</b> (5)     |
| $\Sigma$                                | <b>117</b> (123)                        | <b>72</b> (73) | <b>0</b> (0) | <b>189</b> (196) |

Bold numbers show data after matching (diary-optimized), numbers in parentheses show crude data; n.d. = not defined.

**Table S3:** Degree distributions and impact on basic reproduction number  $R_0$ .

| Dataset                                                    | Duration included | <i>Mdn</i> (IQR) | <i>M</i> ( <i>SD</i> ) | Range | CV [%] | $R_{0,het}/R_{0,hom}$ [%] |
|------------------------------------------------------------|-------------------|------------------|------------------------|-------|--------|---------------------------|
| Reported (crude)                                           | All               | 4 (2-5)          | 4.4 (3.1)              | 0-14  | 69.6   | 148                       |
|                                                            | >15 min           | 1 (0-3)          | 1.6 (1.8)              | 0-8   | 109.0  | 219                       |
| Reported (matched and discordant missing contacts imputed) | All               | 5 (3-6)          | 5.1 (3.4)              | 0-15  | 65.5   | 143                       |
|                                                            | >15 min           | 1 (0-3)          | 1.7 (1.8)              | 0-8   | 106.2  | 213                       |
| Recorded (crude)                                           | All               | 7 (4-10)         | 8.1 (4.9)              | 1-22  | 61.2   | 137                       |
|                                                            | >15 min           | 0 (0-1)          | 0.5 (0.7)              | 0-3   | 148.0  | 319                       |
| Recorded (filtered)                                        | All               | 7 (4-9)          | 7.2 (4.1)              | 1-20  | 57.5   | 133                       |
|                                                            | >15 min           | 0 (0-1)          | 0.5 (0.7)              | 0-2   | 144.0  | 307                       |

Reported contact data: N=74; recorded contact data: N=76; Mdn: median; IQR: interquartile range; M: mean; SD: standard deviation; CV: coefficient of variation;  $R_{0,het}/R_{0,hom}$ : ratio of  $R_0$  corrected for degree heterogeneity and the uncorrected one.
